# Supplementary material for: Features and Practicability of the Next-Generation Sensors and Monitors for Exposure Assessment to Airborne Pollutants: A Systematic Review
Source: MDPI journal article supplement (doi:10.3390/s21134513), 2021-06-30
Supplement: s1 [file s1]

Review

# Supplementary Materials: Features and Practicability of the Next-Generation Sensors and Monitors for Exposure Assessment to Airborne Pollutants: A Systematic Review

Giacomo Fanti, Francesca Borghi, Andrea Spinazzè, Sabrina Rovelli, Davide Campagnolo, Marta Keller, Andrea Cattaneo, Emanuele Cauda and Domenico Maria Cavallo.

**Table S1.** Studies object of the review. In this table are reported all the sources considered in this review, divided by author, title, reference and the corresponding number of citations in the text.

| First Author | Title                                                                                                                                  | Journal                                                                                | Year of publication | Citation |
|--------------|----------------------------------------------------------------------------------------------------------------------------------------|----------------------------------------------------------------------------------------|---------------------|----------|
| Q. Dong      | A Cloud-connected NO <sub>2</sub> and Ozone Sensor System for Personalized Pediatric Asthma Research and Management                    | IEEE Sensors Journal                                                                   | 2020                | [54]     |
| S. De Vito   | A crowdfunded personal air quality monitor infrastructure for active life applications                                                 | IEEE International Workshop on Measurement and Networking (M&N)                        | 2017                | [60]     |
| T. Becnel    | A Distributed Low-Cost Pollution Monitoring Platform                                                                                   | Internet Of Things Journal, Vol. XX, No. XX,                                           | 2018                | [27]     |
| M. Gao       | A distributed network of low-cost continuous reading sensors to measure spatiotemporal variations of PM <sub>2.5</sub> in Xi'an, China | Environmental Pollution                                                                | 2015                | [76]     |
| N. Zimmerman | A machine learning calibration model using random forests to improve sensor performance for lower-cost air quality monitoring          | Atmospheric Measurement Techniques                                                     | 2018                | [34]     |
| Z. Du        | A Miniaturized Particulate Matter Sensing Platform based on CMOS imager and Real Time Image Processing                                 | IEEE Sensors Journal                                                                   | 2018                | [41]     |
| W. Yi        | A Modular Plug-ANA-Play Sensor System for Urban Air Pollution Monitoring: Design, Implementation and Evaluation                        | Sensors- MDPI                                                                          | 2017                | [37]     |
| Y. Deng      | A Novel Wireless Wearable Volatile Organic Compound (VOC) Monitoring Device with Disposable Sensors                                    | Sensors- MDPI                                                                          | 2016                | [79]     |
| M. Balanescu | A study on data accuracy for IoT measurements of PMs concentration                                                                     | International Conference on Control Systems and Computer Science (CSCS)                | 2019                | [43]     |
| B. Dessimond | Academically Produced Air Pollution Sensors for Personal Exposure Assessment: The Canarin Project                                      | Sensors- MDPI                                                                          | 2021                | [40]     |
| M. Ueberham  | Advanced Smartphone-Based Sensing with Open-Source Task Automation                                                                     | Sensors- MDPI                                                                          | 2018                | [80]     |
| N. Alhakbani | Air Pollution Measures in Riyadh City and Personal Exposure Level                                                                      | International Conference on Cloud Computing (ICCC)                                     | 2015                | [81]     |
| M. Balanescu | An Algorithm to Improve Data Accuracy of PMs Concentration Measured with IoT Devices                                                   | Advances in Science, Technology and Engineering Systems Journal Vol. 5, No. 2, 180-187 | 2020                | [42]     |

|                       |                                                                                                                                                                                    |                                                                                              |      |       |
|-----------------------|------------------------------------------------------------------------------------------------------------------------------------------------------------------------------------|----------------------------------------------------------------------------------------------|------|-------|
| R. Huang              | Application and Evaluation of a Low-cost PM Sensor and Data Fusion with CMAQ Simulations to Quantify the Impacts of Prescribed Burning on Air Quality in Southwestern Georgia, USA | Journal of the Air & Waste Management Association                                            | 2021 | [47]  |
| J. M. Barcelo-Ordinas | Calibrating Low-Cost Air Quality Sensors Using Multiple Arrays of Sensors                                                                                                          | IEEE Wireless Communications and Networking Conference                                       | 2018 | [32]  |
| N. Castell            | Can commercial low-cost sensor platforms contribute to air quality monitoring and exposure estimates?                                                                              | Environment International                                                                    | 2016 | [28]  |
| L. Chatzidiakou       | Characterising low-cost sensors in highly portable platforms to quantify personal exposure in diverse environments                                                                 | Atmospheric Measurement Technique                                                            | 2019 | [29]  |
| J. J. Huck            | Combining physiological, environmental and locational sensors for citizen-oriented health applications                                                                             | Environ Monit Assess                                                                         | 2017 | [56]  |
| P. Dutta              | Common Sense - Participatory Urban Sensing using a Network of Handheld Air Quality Monitors                                                                                        | Proceedings of the 7th ACM Conference on Embedded Networked Sensor Systems                   | 2009 | [945] |
| T. Zhang              | Comparison of PM2.5 Exposure in Hazy and Non-Hazy Days in Nanjing, China                                                                                                           | Aerosol Air Qual Res.                                                                        | 2017 | [74]  |
| S.C.C. Lung           | Concurrent Assessment of Personal, Indoor, and Outdoor PM2.5 and PM1 Levels and Source Contributions using Novel Low-cost Sensing Devices                                          | Indoor Air                                                                                   | 2020 | [66]  |
| R. R. Fletcher        | Design and Clinical Feasibility of Personal Wearable Monitor for Measurement of Activity and Environmental Exposure                                                                | 36th Annual International Conference of the IEEE Engineering in Medicine and Biology Society | 2014 | [38]  |
| D. Suriano            | Design and Development of a Flexible, Plug-and-Play, Cost- Effective Tool for on-Field Evaluation of Gas Sensors                                                                   | Journal of Sensors                                                                           | 2020 | [35]  |
| J. Tryner             | Design and evaluation of a portable PM2.5 monitor featuring a low-cost sensor in line with an active filter sampler                                                                | Environ. Sci.: Processes Impacts                                                             | 2019 | [67]  |
| K. R. Mallires        | Developing a Low-Cost Wearable Personal Exposure Monitor for Studying Respiratory Diseases Using Metal-Oxide Sensors                                                               | IEEE SENSORS JOURNAL                                                                         | 2019 | [19]  |
| C. Zuidema            | Estimating personal exposures from a multi-hazard sensor network                                                                                                                   | Journal of Exposure Science & Environmental Epidemiology                                     | 2019 | [61]  |
| S. Mahajan            | Evaluation of low-cost sensors for quantitative personal exposure monitoring                                                                                                       | Sustainable Cities and Society - ELSEVIER                                                    | 2020 | [68]  |
| Y. Zou                | Examining the functional range of commercially available low- cost airborne particle sensors and consequences for monitoring of indoor air quality in residences                   | John Wiley & Sons Ltd                                                                        | 2019 | [65]  |
| Q. Zhang              | Flexible gas sensor based on graphene/ethyl cellulose nanocomposite with ultra-low strain response for volatile organic compounds rapid detection                                  | IOP Publishing - Nanotechnology                                                              | 2018 | [3]   |
| C. Lin                | High Performance Colorimetric Carbon Monoxide Sensor for Continuous Personal Exposure Monitoring                                                                                   | ACS Sensors                                                                                  | 2018 | [45]  |
| R. Chew               | Identification of Bicycling Periods Using the MicroPEM Personal Exposure Monitor                                                                                                   | sensors- MDPI                                                                                | 2019 | [53]  |
| T.T. Win-Shwe         | Improvement of GPS-attached Pocket PM2.5 Measuring Device for Personal Exposure Assessment                                                                                         | J. UOEH                                                                                      | 2020 | [912] |
| D. B. Topalović       | In search of an optimal in-field calibration method of low-cost gas sensors for ambient air pollutants: Comparison of linear, multilinear and artificial neural network approaches | Atmospheric Environment                                                                      | 2019 | [25]  |
| S. Hegde              | Indoor Household Particulate Matter Measurements Using a Network of Low-cost Sensors                                                                                               | Aerosol and Air Quality Research                                                             | 2020 | [52]  |
| J. Núñez              | Inline Infrared Chemical Identification of Particulate Matter                                                                                                                      | Sensors- MDPI                                                                                | 2020 | [70]  |
| D. Sinaga             | Investigation on daily exposure to PM2.5 in Bandung city, Indonesia using low-cost sensor                                                                                          | Journal of Exposure Science & Environmental Epidemiology                                     | 2020 | [72]  |
| M. Mazaheri           | Investigations into factors affecting personal exposure to particles in urban microenvironments using low-cost sensors                                                             | Environment International                                                                    | 2018 | [77]  |

|                    |                                                                                                                                                           |                                                                                                |      |        |
|--------------------|-----------------------------------------------------------------------------------------------------------------------------------------------------------|------------------------------------------------------------------------------------------------|------|--------|
| F. M. J. Bulot     | Long-term field comparison of multiple low-cost particulate matter sensors in an outdoor urban environment                                                | Nature/Scientific Reports                                                                      | 2019 | [71]   |
| G. R. McKercher    | Low-cost mobile air pollution monitoring in urban environments: a pilot study in Lubbock, Texas.                                                          | Environmental Technology                                                                       | 2018 | [59]   |
| G. W. Thomas       | Low-Cost, Distributed Environmental Monitors for Factory Worker Health                                                                                    | Sensors- MDPI                                                                                  | 2018 | [62]   |
| M. Magno           | Low-Power Gas Sensing using Single Walled Carbon Nano tubes in Wearable Devices                                                                           | Environmental Sociology                                                                        | 2017 | [55]   |
| R. Milton          | Mapping Carbon Monoxide Using GPS Tracked Sensors                                                                                                         | Environ Monitoring and Assessment-Springer                                                     | 2007 | [904]  |
| X. Qin             | Micro Quartz Tuning Fork based PM2.5 Sensor for Personal Exposure Monitoring                                                                              | IEEE Sensors Journal                                                                           | 2019 | [82]   |
| S. Nagendra        | Mobile monitoring of air pollution using low cost sensors to visualize spatio-temporal variation of pollutants at urban hotspots                          | Sustainable Cities and Society                                                                 | 2018 | [58]   |
| M. Nyarku          | Mobile phones as monitors of personal exposure to air pollution: Is this the future?                                                                      | PLOS ONE                                                                                       | 2018 | [1113] |
| L. B. Frederickson | Monitoring Excess Exposure to Air Pollution for Professional Drivers in London Using Low-Cost Sensors                                                     | Atmosphere                                                                                     | 2020 | [36]   |
| T.H. Wen           | Monitoring Street-Level Spatial-Temporal Variations of Carbon Monoxide in Urban Settings Using a Wireless Sensor Network (WSN) Framework                  | Environmental Research and Public Health                                                       | 2013 | [64]   |
| M. Reid            | NaDos: A real-time, wearable, personal exposure monitor for hazardous organic vapors                                                                      | Sensors and Actuators B: Chemical                                                              | 2017 | [1004] |
| S. E. West         | Particulate matter pollution in an informal settlement in Nairobi: Using citizen science to make the invisible visible                                    | Applied Geography                                                                              | 2020 | [923]  |
| L. Yang            | People-centric Cognitive Internet of Things for the Quantitative Analysis of Environmental Exposure                                                       | IEEE Internet of Things Journal                                                                | 2017 | [889]  |
| H. Agrawaal        | Personal Exposure Estimates via Portable and Wireless Sensing and Reporting of Particulate Pollution                                                      | Environ. Res. Public Health                                                                    | 2020 | [69]   |
| P. W. Oluwasanya   | Portable Multi-Sensor Air Quality Monitoring Platform for Personal Exposure Studies                                                                       | IEEE Instrumentation & Measurement Magazine                                                    | 2019 | [83]   |
| T. Cao             | Portable, Ambient PM2.5 Sensor for Human and/Or Animal Exposure Studies                                                                                   | Analytical Letters                                                                             | 2016 | [75]   |
| F. Borghi          | Precision and Accuracy of a Direct-Reading Miniaturized Monitor in PM2.5 Exposure Assessment                                                              | Sensors- MDPI                                                                                  | 2018 | [50]   |
| R. Wang            | Real-Time Ozone Detection Based on a Microfabricated Quartz Crystal Tuning Fork Sensor                                                                    | Sensors- MDPI                                                                                  | 2009 | [1045] |
| L.-W. A. Chen      | Schoolchildren's exposure to PM2.5: a student club-based air quality monitoring campaign using low-cost sensors                                           | Air Quality, Atmosphere & Health                                                               | 2020 | [57]   |
| D. K. Arvind       | The AirSpeck family of static and mobile wireless air quality monitors                                                                                    | Euromicro Conference on Digital System Design                                                  | 2016 | [84]   |
| J. Liao            | The use of bluetooth low energy Beacon systems to estimate indirect personal exposure to household air pollution                                          | Journal of Exposure Science & Environmental Epidemiology                                       | 2019 | [78]   |
| M.I. Mead          | The use of electrochemical sensors for monitoring urban air quality in low-cost, high-density networks                                                    | Atmospheric Environment                                                                        | 2012 | [30]   |
| Y. Deng            | Unraveling fabrication and calibration of wearable gas monitor for use under free-living conditions                                                       | Annual International Conference of the IEEE Engineering in Medicine and Biology Society (EMBC) | 2016 | [51]   |
| L. Chatzidiakou    | Using low-cost sensor technologies and advanced computational methods to improve dose estimations in health panel studies: results of the AIRLESS project | Journal of Exposure Science & Environmental Epidemiology                                       | 2020 | [33]   |
| M. Liu             | Using low-cost sensors to monitor indoor, outdoor, and personal ozone concentrations in Beijing, China                                                    | Environmental Science, Processes & Impacts                                                     | 2020 | [31]   |
| K. K. Barkjohn     | Using Low-cost Sensors to Quantify the Effects of Air Filtration on Indoor and Personal Exposure Relevant PM2.5 Concentrations in Beijing, China          | Aerosol and Air Quality Research                                                               | 2020 | [73]   |

|                      |                                                                                                                                                    |                                          |      |      |
|----------------------|----------------------------------------------------------------------------------------------------------------------------------------------------|------------------------------------------|------|------|
| M. J. Nieuwenhuijsen | Variability in and Agreement between Modeled and Personal Continuously Measured Black Carbon Levels Using Novel Smartphone and Sensor Technologies | Environmental Science & Technology       | 2015 | [39] |
| N. Dam               | Wearable Sensors for Analyzing Personal Exposure to Air Pollution                                                                                  | IEE - SIEDS                              | 2017 | [63] |
| M. Ueberham          | Wearable sensors for multifactorial personal exposure measurements – A ranking study                                                               | Environment International                | 2018 | [85] |
| J. E. Johnston       | Youth Engaged Participatory Air Monitoring: A ‘Day in the Life’ in Urban Environmental Justice Communities                                         | Environmental Research and Public Health | 2019 | [86] |

**Table S2.** Gas sensors and monitors (\*) characteristics reported in the papers analyzed in this review. In the case of missing data within the reference papers, data were acquired from the literature cited in the bibliography or from external sources (retailer’s website). n.a.: not available.

| Gas sensors and monitors |                          |                           |                  |        |                   |                                              |
|--------------------------|--------------------------|---------------------------|------------------|--------|-------------------|----------------------------------------------|
| Pollutants               | Sensor name/models       | Sensor Technology         | Dimension        | Weight | Operational Range | Sensitivity                                  |
| NO <sub>2</sub>          | Alphasense NO2-A1        | Electrochemical           | 20,2x16,5 mm     | <6g    | 0-20 ppm          | -400 to -750 nA/ppm at 10ppm NO <sub>2</sub> |
|                          | Alphasense NO2-A43F      | Electrochemical           | 20,2x16,5 mm     | <6g    | 0-20 ppm          | -175 to -450 nA/ppm at 2ppm NO <sub>2</sub>  |
|                          | Alphasense NO2-B43F      | Electrochemical           | 32,3x16,5 mm     | <13g   | 0-20 ppm          | -200 to -650 nA/ppm at 2ppm NO <sub>2</sub>  |
|                          | e2V MiCS-2710            | Metal Oxide semiconductor | 9,15x13,9 mm     | n.a.   | 0-5 ppm           | n.a.                                         |
|                          | SGX SensorTech MiCS 2714 | Metal Oxide semiconductor | 5x7x1,55 mm      | 4g     | 0-10 ppm          | n.a.                                         |
|                          | SGX SensorTech MiCS-4514 | Metal Oxide semiconductor | 5x7x1,55 mm      | 4,087g | 0-10 ppm          | n.a.                                         |
| O <sub>3</sub>           | Alphasense OX-A431       | Electrochemical           | 20,2x16,5 mm     | <6g    | 0-50 ppm          | -200 to -650 nA/ppm at 1ppm O <sub>3</sub>   |
|                          | Alphasense Ox-B431       | Electrochemical           | 32,3x16,5 mm     | <6g    | 0-50 ppm          | -225 to -750 nA/ppm at 1ppm O <sub>3</sub>   |
|                          | Nissha FIS SP-61         | Metal Oxide semiconductor | 51x37x22 mm      | 15g    | 0-250 ppb         | n.a.                                         |
|                          | SGX Sensortech MICS 2614 | Metal Oxide semiconductor | 5x7x1,55 mm      | 4g     | 10-1000 ppb       | n.a.                                         |
|                          | Winsen MQ-131            | Metal Oxide semiconductor | 24x19 mm         | 4,5g   | 10-1000 ppb       | n.a.                                         |
| CO                       | Alphasense CO-A4         | Electrochemical           | 20,2x16,5 mm     | <6g    | 0-500 ppm         | 220 to 410 nA/ppm at 2ppm CO                 |
|                          | Alphasense CO-AF         | Electrochemical           | 20,2x16,5 mm     | <6g    | 0-5000 ppm        | 55 to 90 nA/ppm at 400ppm CO                 |
|                          | Alphasense CO-B4         | Electrochemical           | 32,3x16,5 mm     | <13g   | 0-1000 ppm        | 420 to 650 nA/ppm at 2ppm CO                 |
|                          | e2V MiCS-5525            | Metal Oxide semiconductor | 11x24,5 mm       | n.a.   | 0-1000 ppm        | n.a.                                         |
|                          | Figaro TGS 2442          | Metal Oxide semiconductor | 9,2x22,7 mm      | n.a.   | 30-1000 ppm       | n.a.                                         |
|                          | SGX SensorTech MiCS-4514 | Metal Oxide semiconductor | 5x7x1,55 mm      | 4,087g | 1-1000 ppm        | n.a.                                         |
|                          | Winsen MQ-7              | Metal Oxide semiconductor | 16,5x14,54 mm    | n.a.   | 10-500 ppm        | n.a.                                         |
| VOC                      | Sensirion SGP30          | Metal Oxide semiconductor | 2,45x2,45x0,9 mm | n.a.   | 0-60000 ppb       | n.a.                                         |
|                          | Sensirion SGPC3          | Metal Oxide semiconductor | 2,45x2,45x0,9 mm | n.a.   | 0-60000 ppb       | n.a.                                         |

\*Sailbri Cooper Inc SCI-608 can monitor NO<sub>2</sub>, O<sub>3</sub>, CO; Dimension: 220x200x300 mm; Weight: 2,6kg; Operational Range: 0-500 ppm

**Table S3.** Particulate sensors and monitors (\*) characteristics reported in the papers object of this review. In the case of missing data within the reference papers, data were acquired from the literature cited in the bibliography or from external sources (retailer’s website). n.a.: not available.

| PM sensors and monitors                                                                                                                                                                                                                         |                                |                   |               |         |                           |                       |
|-------------------------------------------------------------------------------------------------------------------------------------------------------------------------------------------------------------------------------------------------|--------------------------------|-------------------|---------------|---------|---------------------------|-----------------------|
| Pollutants                                                                                                                                                                                                                                      | Sensor name/models             | Sensor Technology | Dimension     | Weight  | Operational Range         | Sensitivity           |
| PM                                                                                                                                                                                                                                              | Honeywell HPM A115S0           | Light Scattering  | 44x36x12mm    | 82,330g | 0-1000 µg/m <sup>3</sup>  | 15 µg/m <sup>3</sup>  |
|                                                                                                                                                                                                                                                 | Nova Fitness SDS-011           |                   | 71x70x23 mm   | n.a.    | 0-999,9 µg/m <sup>3</sup> | n.a.                  |
|                                                                                                                                                                                                                                                 | Plantower PMS3003              |                   | 65x42x23 mm   | 35g     | 0-500 µg/m <sup>3</sup>   | 1 µg/m <sup>3</sup>   |
|                                                                                                                                                                                                                                                 | Plantower pms5003              |                   | 50x38x21 mm   | 42g     | 0-500 µg/m <sup>3</sup>   | 1 µg/m <sup>3</sup>   |
|                                                                                                                                                                                                                                                 | Sharp Electronics GP2Y1010AU0F |                   | 46x34x18,3 mm | 16g     | 0-600 µg/m <sup>3</sup>   | 0,1 µg/m <sup>3</sup> |
| PM <sub>2.5</sub>                                                                                                                                                                                                                               | Alphasense OPC-N2              | Light Scattering  | 75x60x63 mm   | 105g    | 0-1500 µg/m <sup>3</sup>  | 0,1 µg/m <sup>3</sup> |
|                                                                                                                                                                                                                                                 | Plantower pms3003              |                   | 65x42x23 mm   | 35g     | 0-500 µg/m <sup>3</sup>   | 1 µg/m <sup>3</sup>   |
|                                                                                                                                                                                                                                                 | *RTI International MicroPEM    |                   | n.a.          | 240g    | 0-10000 µg/m <sup>3</sup> | 5 µg/m <sup>3</sup>   |
|                                                                                                                                                                                                                                                 | Sharp DN7C3CA006               |                   | 51x53x40 mm   | n.a.    | 25-500 µg/m <sup>3</sup>  | 0,1 µg/m <sup>3</sup> |
|                                                                                                                                                                                                                                                 | Shinyei PPD42NS                |                   | 59x45x22 mm   | 28 g    | 0-500 µg/m <sup>3</sup>   | 9,1 µg/m <sup>3</sup> |
|                                                                                                                                                                                                                                                 | Shinyei PPD60PV- T2            |                   | 88x60x22 mm   | 36 g    | 0-500 µg/m <sup>3</sup>   | 29 µg/m <sup>3</sup>  |
| *Sailbri Cooper Inc SCI-608 can monitor PM <sub>2.5</sub> and PM <sub>10</sub> ; Sensor Technology is Light Scattering; Dimension: 220x200x300 mm; Weight: 2,6kg; Operational Range:0-1000 µg/m <sup>3</sup> ; Sensitivity: 5 µg/m <sup>3</sup> |                                |                   |               |         |                           |                       |
| *TSI OPS3330 can monitor several PM size fractions; Sensor Technology is Light Scattering; Dimension: 135x216x224 mm; Weight: 2,0kg; Operational Range: 0,001-275 µg/m <sup>3</sup> ; Sensitivity: 0,001 µg/m <sup>3</sup>                      |                                |                   |               |         |                           |                       |
